# Supplementary material for: Unstable climate for 50,000 years after Chicxulub impact: evidence from Antarctica
Source: Research Square preprint supplement (doi:10.21203/rs.3.rs-8071084/v1), 2025-11-26
Supplement: Supplementary file 2 [file e59654befd0e31b809af15dc.xlsx]

## Sheet: Sheet1
La	Ce	Pr	Nd	Sm	Eu	Gd	Tb	Dy	Ho	Er	Tm	Yb	Lu	Chondrite-normalised REE	La	Ce	Pr	Nd	Sm	Eu	Gd	Tb	Dy	Ho	Er	Tm	Yb	Lu
41.3811	91.8598	10.2389	38.155	7.66801	1.41117	6.47637	0.917729	5.33568	1.04404	2.86066	0.42831	2.85318	0.429999		112.755	95.9872	74.7364	53.6638	33.1949	16.2203	21.1646	15.8229	14.0044	12.2683	11.4886	12.0312	11.5047	11.2861
40.8882	89.8945	10.1089	38.487	7.51376	1.33978	6.14181	0.860167	4.99563	0.975914	2.73661	0.412238	2.77413	0.424492		111.412	93.9337	73.7878	54.1308	32.5271	15.3998	20.0713	14.8305	13.1119	11.4678	10.9904	11.5797	11.186	11.1415
40.9547	89.6296	10.0861	39.0909	7.90941	1.5468	7.41344	1.08097	6.70471	1.37278	3.77549	0.554646	3.57466	0.541925		111.593	93.6568	73.6211	54.9802	34.2399	17.7793	24.2269	18.6373	17.5977	16.1314	15.1626	15.5799	14.414	14.2237
38.3658	82.8205	9.35853	35.6596	7.27646	1.34036	6.26998	0.902326	5.41322	1.10191	3.1137	0.480264	3.20656	0.491494		104.539	86.5418	68.3104	50.1542	31.4998	15.4065	20.4901	15.5573	14.2079	12.9484	12.5048	13.4906	12.9297	12.9001
38.77	81.5739	9.11851	34.0796	6.79258	1.26081	5.93351	0.869046	5.33852	1.09955	3.07938	0.472638	3.20826	0.487401		105.64	85.2392	66.5585	47.9319	29.4051	14.492	19.3905	14.9836	14.0119	12.9207	12.367	13.2764	12.9365	12.7927
42.7348	93.4748	10.5329	39.8764	8.02806	1.31833	6.70873	0.919558	5.29124	1.02157	2.75336	0.417353	2.79466	0.417408		116.444	97.6748	76.8822	56.0849	34.7535	15.1532	21.9239	15.8544	13.8878	12.0044	11.0577	11.7234	11.2688	10.9556
44.6084	96.7144	10.922	42.1002	8.17804	1.25176	6.97837	0.976061	5.71184	1.13442	3.10839	0.474172	3.20041	0.49086		121.549	101.06	79.7226	59.2127	35.4028	14.3881	22.8051	16.8286	14.9917	13.3304	12.4835	13.3195	12.9049	12.8835
38.5654	81.4575	9.37928	35.6495	7.44188	1.00858	6.4376	0.913021	5.32796	1.01706	2.6712	0.379832	2.44034	0.348283		105.083	85.1175	68.4619	50.1399	32.2159	11.5928	21.0379	15.7417	13.9842	11.9513	10.7277	10.6694	9.84007	9.14127
35.6771	75.9348	8.85804	33.1548	6.87444	0.857767	5.84077	0.833565	4.81399	0.903647	2.29389	0.318661	1.98856	0.28183		97.2129	79.3467	64.6572	46.6312	29.7595	9.85939	19.0875	14.3718	12.6351	10.6186	9.2124	8.95114	8.01839	7.39712
46.9759	108.018	12.0354	46.5909	8.79793	1.49961	7.16322	0.967664	5.48246	1.07162	2.90139	0.435454	2.92763	0.447941		128	112.871	87.8495	65.5288	38.0863	17.2369	23.4092	16.6839	14.3896	12.5924	11.6522	12.2319	11.805	11.757
42.1466	92.6415	10.2761	38.361	7.5568	1.41053	6.33639	0.859115	4.95811	0.986942	2.69805	0.412395	2.74982	0.424133		114.841	96.8041	75.0082	53.9535	32.7134	16.213	20.7072	14.8123	13.0134	11.5974	10.8356	11.5841	11.088	11.1321
48.5414	107.336	11.8301	45.2248	8.57336	1.44812	6.99015	0.973262	5.76048	1.14165	3.1463	0.476701	3.19076	0.481318		132.265	112.159	86.351	63.6073	37.1141	16.6451	22.8436	16.7804	15.1194	13.4153	12.6358	13.3905	12.866	12.633
46.0801	104.715	11.6588	45.3258	8.62326	1.52399	6.96697	0.963435	5.48725	1.0602	2.83699	0.422089	2.75987	0.419872		125.559	109.42	85.1008	63.7494	37.3301	17.5171	22.7679	16.6109	14.4022	12.4583	11.3935	11.8564	11.1285	11.0203
43.9407	100.365	11.0977	42.6275	8.08489	1.4708	6.64489	0.903487	5.05102	0.958755	2.56193	0.374574	2.42868	0.369502		119.729	104.874	81.0055	59.9543	34.9995	16.9058	21.7153	15.5774	13.2573	11.2662	10.2889	10.5217	9.79308	9.69821
47.8596	109.296	12.0406	46.0767	9.06832	1.5245	8.03024	1.13616	6.43917	1.20709	3.10918	0.448712	2.89609	0.42785		130.408	114.207	87.8875	64.8054	39.2568	17.523	26.2426	19.589	16.9007	14.1843	12.4867	12.6043	11.6778	11.2297
46.993	108.454	11.9005	45.7651	8.95586	1.5757	7.41172	1.00703	5.70679	1.10331	3.01651	0.446253	2.97326	0.445823		128.046	113.327	86.8647	64.3673	38.77	18.1115	24.2213	17.3625	14.9784	12.9649	12.1145	12.5352	11.9889	11.7014
45.1742	102.756	11.2435	42.8871	8.14269	1.43208	6.82304	0.942376	5.39805	1.05405	2.85856	0.427004	2.81872	0.430325		123.091	107.373	82.0692	60.3194	35.2498	16.4607	22.2975	16.2479	14.1681	12.386	11.4802	11.9945	11.3658	11.2946
49.9465	113.042	12.5475	47.8902	9.11755	1.54288	7.51188	1.02215	5.73961	1.11243	3.00937	0.445174	2.95107	0.445961		136.094	118.121	91.5879	67.3562	39.4699	17.7343	24.5486	17.6233	15.0646	13.072	12.0858	12.5049	11.8995	11.705
50.2246	113.24	12.484	47.485	8.94156	1.4516	7.28698	0.986122	5.5497	1.06349	2.86561	0.410887	2.70272	0.406721		136.852	118.328	91.1241	66.7862	38.708	16.685	23.8137	17.0021	14.5661	12.4969	11.5085	11.5418	10.898	10.6751
46.059	104.353	11.4344	44.0564	8.42965	1.47361	7.03809	0.975483	5.6683	1.11577	3.06897	0.462279	3.049	0.454158		125.501	109.042	83.4625	61.964	36.492	16.9381	23.0003	16.8187	14.8774	13.1113	12.3252	12.9854	12.2944	11.9202
43.5311	97.057	10.6144	39.8672	7.57307	1.40268	6.47501	0.880141	5.09997	0.9824	2.63743	0.386646	2.55671	0.372876		118.613	101.418	77.4774	56.072	32.7839	16.1227	21.1602	15.1748	13.3858	11.5441	10.5921	10.8609	10.3093	9.78678
44.244	98.1933	10.9532	41.5211	7.95861	1.32572	6.52053	0.905945	5.22836	1.01933	2.83361	0.42209	2.80636	0.427559		120.556	102.605	79.9507	58.3982	34.4528	15.2381	21.3089	15.6197	13.7227	11.978	11.3799	11.8565	11.316	11.222
47.5467	108.169	11.921	46.0981	8.80511	1.62225	7.18955	0.987567	5.73661	1.12433	3.09968	0.457644	3.02095	0.459005		129.555	113.029	87.0143	64.8355	38.1173	18.6466	23.4953	17.027	15.0567	13.2118	12.4485	12.8552	12.1813	12.0474
46.888	107.483	11.9222	45.5571	8.85083	1.60163	7.27565	0.992534	5.61929	1.08205	2.89422	0.42445	2.81371	0.427557		127.76	112.312	87.0234	64.0746	38.3153	18.4095	23.7766	17.1127	14.7488	12.7151	11.6234	11.9228	11.3456	11.222
50.4293	111.315	12.452	47.2374	8.89685	1.60119	7.38264	0.997468	5.74807	1.10818	2.99677	0.446864	3.01378	0.464536		137.409	116.316	90.8905	66.438	38.5145	18.4045	24.1263	17.1977	15.0868	13.0221	12.0352	12.5524	12.1523	12.1926
45.7244	103.843	11.5189	44.1147	8.41351	1.53926	7.05818	0.996807	5.88351	1.1765	3.25541	0.480138	3.24986	0.49565		124.59	108.509	84.0797	62.0459	36.4221	17.6927	23.066	17.1863	15.4423	13.8249	13.0739	13.487	13.1043	13.0092
49.4435	109.467	12.1281	46.2069	8.83716	1.57404	7.45541	1.02737	5.87719	1.16461	3.13047	0.468447	3.13119	0.481394		134.724	114.385	88.5263	64.9886	38.2561	18.0924	24.3641	17.7133	15.4257	13.6852	12.5722	13.1586	12.6258	12.635
50.9103	112.722	12.5675	48.2765	9.18195	1.53378	7.6864	1.03942	5.73987	1.1062	2.98891	0.442719	2.96388	0.458298		138.72	117.787	91.7334	67.8995	39.7487	17.6296	25.119	17.921	15.0653	12.9988	12.0036	12.4359	11.9511	12.0288
47.3299	106.334	11.9108	45.1259	8.63673	1.50045	7.20935	0.983878	5.59888	1.09093	2.97877	0.445006	3.02044	0.464738		128.964	111.112	86.9401	63.4682	37.3884	17.2466	23.56	16.9634	14.6952	12.8193	11.9629	12.5002	12.1792	12.1978
51.4328	113.223	12.5401	47.6049	8.87982	1.55512	7.66349	1.06873	6.35344	1.29375	3.53762	0.523496	3.49086	0.532991		140.144	118.31	91.5338	66.9549	38.4408	17.8749	25.0441	18.4264	16.6757	15.2027	14.2073	14.7049	14.0761	13.9893
48.3049	107.782	11.9962	45.8992	8.79348	1.51255	7.34636	1.02092	5.92903	1.18334	3.234	0.481556	3.18876	0.491857		131.621	112.625	87.5638	64.5559	38.067	17.3857	24.0077	17.6021	15.5618	13.9053	12.9879	13.5269	12.8579	12.9096
49.9077	111.226	12.4442	47.5846	9.02687	1.54129	7.60616	1.0561	6.08066	1.2051	3.3034	0.487994	3.22724	0.497256		135.988	116.224	90.8333	66.9263	39.0774	17.716	24.8567	18.2086	15.9597	14.161	13.2667	13.7077	13.0131	13.0513
48.6094	106.395	11.9902	45.7912	8.58814	1.45766	6.91383	0.970775	5.59909	1.10242	3.06688	0.457549	3.07892	0.476479		132.451	111.176	87.5196	64.4039	37.1781	16.7547	22.5942	16.7375	14.6958	12.9544	12.3168	12.8525	12.415	12.506
43.5736	96.7098	10.7457	41.2539	7.95656	1.46104	6.81759	0.972234	5.80569	1.16227	3.2746	0.486907	3.27013	0.494082		118.729	101.055	78.4358	58.0224	34.444	16.7936	22.2797	16.7627	15.238	13.6577	13.151	13.6772	13.186	12.968
42.8088	95.3806	10.6218	40.9162	7.84589	1.49263	6.67573	0.960574	5.70769	1.14828	3.18442	0.474997	3.19798	0.491296		116.645	99.6662	77.5317	57.5474	33.9649	17.1566	21.8161	16.5616	14.9808	13.4934	12.7888	13.3426	12.8951	12.8949
43.4348	97.5931	10.8292	41.8853	8.0814	1.52236	6.92584	0.977388	5.86949	1.17962	3.2679	0.485968	3.24825	0.491751		118.351	101.978	79.0454	58.9105	34.9844	17.4984	22.6335	16.8515	15.4055	13.8616	13.1241	13.6508	13.0978	12.9068
43.053	96.2748	10.8635	42.4482	8.23075	1.55225	7.17835	1.00733	5.97371	1.18139	3.22985	0.481317	3.1783	0.487158		117.311	100.601	79.2956	59.7021	35.6309	17.842	23.4587	17.3677	15.679	13.8824	12.9713	13.5201	12.8157	12.7863
38.4364	87.0373	9.88699	39.4644	7.9012	1.51979	6.8324	0.977147	5.87613	1.14218	3.067	0.446858	2.96325	0.444684		104.731	90.9481	72.1678	55.5055	34.2043	17.4688	22.3281	16.8474	15.4229	13.4216	12.3173	12.5522	11.9486	11.6715
41.948	100.562	10.9874	42.7745	8.38254	1.57333	7.01539	0.981411	5.54585	1.06774	2.81863	0.40965	2.66409	0.398892		114.3	105.081	80.2002	60.1611	36.2881	18.0843	22.9261	16.9209	14.556	12.5469	11.3198	11.507	10.7423	10.4696
47.6252	116.012	12.469	48.3933	9.57278	1.73577	7.898	1.11275	6.44607	1.22047	3.25446	0.46284	3.02476	0.447251		129.769	121.224	91.0143	68.0637	41.4406	19.9514	25.8105	19.1853	16.9188	14.3415	13.0701	13.0011	12.1966	11.7389
47.8661	115.031	12.3918	47.5801	9.27217	1.64368	7.65292	1.06508	6.14414	1.17002	3.16536	0.4683	3.15113	0.469341		130.425	120.2	90.4511	66.92	40.1392	18.8929	25.0095	18.3635	16.1264	13.7487	12.7123	13.1545	12.7062	12.3187
48.947	117.246	12.5375	48.3811	9.42354	1.68833	7.7177	1.07354	6.12664	1.1766	3.16024	0.46419	3.0975	0.463085		133.371	122.514	91.5146	68.0466	40.7945	19.4061	25.2213	18.5093	16.0804	13.8261	12.6917	13.0391	12.4899	12.1545
52.155	123.247	13.1474	50.6383	9.72934	1.6869	8.06656	1.13288	6.50596	1.27085	3.47353	0.511755	3.41035	0.510707		142.112	128.785	95.9663	71.2212	42.1183	19.3896	26.3613	19.5324	17.076	14.9336	13.9499	14.3752	13.7514	13.4044
46.216	110.623	11.8591	45.231	8.83068	1.60906	7.44028	1.0212	5.86222	1.15026	3.10928	0.451761	2.96227	0.4469		125.929	115.594	86.5627	63.616	38.2281	18.4949	24.3146	17.6069	15.3864	13.5165	12.4871	12.6899	11.9447	11.7297
47.6424	112.851	12.0628	46.5877	8.95206	1.63529	7.55173	1.03894	5.95397	1.15374	3.13616	0.460396	3.02994	0.455137		129.816	117.922	88.0497	65.5242	38.7535	18.7964	24.6788	17.9128	15.6272	13.5575	12.595	12.9325	12.2175	11.9458
50.8611	120.254	12.9479	50.5479	9.68851	1.65828	7.80291	1.07684	6.18281	1.1925	3.25141	0.475265	3.15998	0.477917		138.586	125.658	94.5101	71.0941	41.9416	19.0607	25.4997	18.5662	16.2278	14.0129	13.0579	13.3501	12.7419	12.5437
54.4874	127.604	13.7828	52.8019	10.0944	1.66313	8.28712	1.12288	6.21859	1.18146	3.19173	0.466398	3.12518	0.482492		148.467	133.337	100.604	74.2643	43.6986	19.1164	27.0821	19.36	16.3218	13.8832	12.8182	13.1011	12.6015	12.6638
40.6159	92.7491	9.96604	37.1056	7.29155	1.2285	5.99075	0.853503	4.8169	0.969563	2.65069	0.395511	2.63285	0.405908		110.67	96.9165	72.7448	52.1879	31.5652	14.1207	19.5776	14.7156	12.6428	11.3932	10.6453	11.1098	10.6163	10.6538
43.9084	104.517	10.3692	39.353	8.37718	1.4913	7.00227	0.976115	5.62883	1.09075	2.93609	0.451644	2.90665	0.441382		119.641	109.213	75.6879	55.3487	36.2648	17.1413	22.8832	16.8296	14.7738	12.8173	11.7915	12.6866	11.7204	11.5848
37.939	87.4692	9.45853	35.013	6.95466	1.20618	5.80313	0.80892	4.61862	0.918119	2.54905	0.378729	2.53044	0.389032		103.376	91.3994	69.0404	49.2447	30.1068	13.8641	18.9645	13.9469	12.1224	10.7887	10.2371	10.6385	10.2034	10.2108
49.3436	117.313	12.6363	48.3304	9.26799	1.60424	7.72654	1.08441	5.9471	1.14504	3.06663	0.444309	2.95345	0.439692		134.451	122.584	92.2361	67.9753	40.1212	18.4395	25.2501	18.6967	15.6092	13.4553	12.3158	12.4806	11.9091	11.5405
50.7822	124.183	13.1719	50.7654	9.75331	1.74705	8.0108	1.10619	6.2011	1.18421	3.16469	0.462573	3.03916	0.451305		138.371	129.763	96.1455	71.4	42.2221	20.0811	26.1791	19.0723	16.2758	13.9156	12.7096	12.9936	12.2547	11.8453
53.9127	130.394	13.8381	52.8695	10.0593	1.74718	8.02837	1.08503	5.88083	1.10612	2.93661	0.423348	2.73834	0.410832		146.901	136.253	101.008	74.3593	43.5466	20.0825	26.2365	18.7073	15.4352	12.9979	11.7936	11.8918	11.0417	10.783
48.7456	119.479	12.5614	48.1602	9.27762	1.68794	7.48628	1.02756	5.70753	1.0929	2.91198	0.428061	2.80779	0.421437		132.822	124.847	91.6893	67.7358	40.1629	19.4016	24.465	17.7165	14.9804	12.8425	11.6947	12.0242	11.3217	11.0613
46.4022	112.776	11.8011	45.7754	8.82453	1.63404	7.31376	1.01152	5.65698	1.08397	2.86873	0.414385	2.68565	0.404191		126.436	117.844	86.1391	64.3817	38.2014	18.7821	23.9012	17.44	14.8477	12.7376	11.521	11.64	10.8292	10.6087
49.1806	118.463	12.4139	47.6614	9.12282	1.64896	7.50161	1.0368	5.81688	1.11369	2.96052	0.428226	2.79805	0.419652		134.007	123.786	90.6125	67.0343	39.4927	18.9535	24.5151	17.8759	15.2674	13.0869	11.8896	12.0288	11.2825	11.0145
45.7078	112.639	11.7865	45.7347	8.87798	1.66445	7.25545	0.99223	5.4721	1.03973	2.78691	0.412961	2.71149	0.40137		124.544	117.701	86.0326	64.3245	38.4328	19.1316	23.7106	17.1074	14.3625	12.2177	11.1924	11.6	10.9334	10.5346
44.67	109.276	11.3223	44.0006	8.61445	1.60456	7.07062	1.00322	5.64687	1.09607	2.94991	0.435056	2.84501	0.423895		121.717	114.186	82.6446	61.8855	37.292	18.4432	23.1066	17.2968	14.8212	12.8798	11.847	12.2207	11.4718	11.1259
51.2903	126.251	13.1794	50.8197	9.8789	1.77053	7.86438	1.07809	5.9442	1.11181	2.95668	0.442496	2.90721	0.437002		139.756	131.924	96.1998	71.4764	42.7658	20.3509	25.7006	18.5877	15.6016	13.0647	11.8742	12.4297	11.7226	11.4699
50.9955	129.758	13.363	52.219	10.1009	1.90684	8.26516	1.1374	6.24875	1.17087	3.07361	0.43933	2.83226	0.421956		138.952	135.589	97.5399	73.4444	43.7269	21.9177	27.0103	19.6103	16.4009	13.7588	12.3438	12.3407	11.4204	11.075
52.8992	133.723	13.7174	53.4595	10.4876	1.92956	8.40488	1.12826	6.2262	1.14861	3.01822	0.43987	2.85116	0.413585		144.14	139.732	100.127	75.1892	45.4007	22.1788	27.4669	19.4528	16.3417	13.4972	12.1214	12.3559	11.4966	10.8553
58.5198	151.122	15.3902	59.6667	11.6382	2.05596	9.21405	1.24815	6.72399	1.21542	3.15313	0.444759	2.87649	0.418576		159.454	157.912	112.337	83.9194	50.3817	23.6318	30.1113	21.5198	17.6483	14.2823	12.6632	12.4932	11.5987	10.9862
55.7991	143.368	14.8329	57.321	11.3071	2.05475	9.18363	1.22547	6.65849	1.23914	3.187	0.451312	2.92865	0.434472		152.041	149.81	108.27	80.6203	48.9484	23.6179	30.0119	21.1288	17.4764	14.561	12.7992	12.6773	11.8091	11.4035
55.9513	143.702	14.7556	57.2742	11.3599	2.08694	9.24112	1.26212	6.95105	1.30164	3.38803	0.491234	3.14236	0.45509		152.456	150.158	107.705	80.5545	49.177	23.9878	30.1998	21.7606	18.2442	15.2954	13.6065	13.7987	12.6708	11.9446
56.2708	146.339	14.9629	58.1656	11.3735	2.08918	9.18937	1.2343	6.6982	1.22075	3.13839	0.442392	2.85873	0.421834		153.327	152.914	109.218	81.8082	49.236	24.0136	30.0306	21.281	17.5806	14.3449	12.604	12.4267	11.5271	11.0718
57.3263	148.852	15.4351	59.3131	11.7942	2.15388	9.49599	1.28556	6.9732	1.27343	3.29138	0.468253	3.01863	0.441891		156.202	155.54	112.665	83.4222	51.0573	24.7572	31.0326	22.1648	18.3024	14.964	13.2184	13.1532	12.1719	11.5982
58.3933	150.208	15.6555	59.9263	11.7984	2.10499	9.55335	1.27952	6.9843	1.28262	3.32847	0.472606	3.10444	0.455777		159.11	156.957	114.274	84.2846	51.0753	24.1952	31.2201	22.0606	18.3315	15.0719	13.3673	13.2754	12.5179	11.9627
53.4191	136.975	14.2994	55.438	10.9754	2.01926	8.95709	1.22496	6.75104	1.25332	3.29316	0.477337	3.10509	0.462071		145.556	143.13	104.375	77.9719	47.5126	23.2099	29.2715	21.1201	17.7193	14.7276	13.2255	13.4083	12.5205	12.1278
58.5321	150.485	15.5353	60.1991	11.7804	2.08698	9.40221	1.27936	6.92883	1.26768	3.29133	0.469164	3.02732	0.441606		159.488	157.246	113.396	84.6683	50.9973	23.9883	30.7262	22.058	18.1859	14.8964	13.2182	13.1788	12.207	11.5907
52.8788	132.94	13.94	53.5347	10.5712	1.91123	8.42756	1.16784	6.54178	1.22095	3.20837	0.467514	3.03215	0.451417		144.084	138.914	101.752	75.295	45.763	21.9682	27.541	20.1352	17.17	14.3472	12.885	13.1324	12.2264	11.8482
50.9903	126.193	13.3476	51.3584	10.1198	1.87614	8.32198	1.15985	6.44673	1.21093	3.20859	0.464011	3.02966	0.453724		138.938	131.863	97.4279	72.234	43.8087	21.5648	27.196	19.9975	16.9205	14.2295	12.8859	13.034	12.2164	11.9088
49.3262	122.72	12.9403	49.8893	9.8708	1.86057	8.14872	1.14006	6.4372	1.22333	3.23921	0.480985	3.11252	0.45505		134.404	128.234	94.4547	70.1678	42.7308	21.3858	26.6298	19.6563	16.8955	14.3752	13.0089	13.5108	12.5505	11.9436
49.2847	122.71	12.9389	50.0638	9.88934	1.82733	8.11246	1.13769	6.38976	1.20511	3.19555	0.46806	2.996	0.444697		134.291	128.224	94.4444	70.4133	42.811	21.0038	26.5113	19.6153	16.771	14.1611	12.8335	13.1478	12.0807	11.6718
49.7805	122.943	12.9337	50.4234	9.88911	1.844	7.97344	1.10802	6.1658	1.136	2.97217	0.432421	2.79919	0.415415		135.642	128.467	94.4066	70.919	42.81	21.1954	26.057	19.1039	16.1832	13.349	11.9364	12.1466	11.287	10.9033
47.6063	118.142	12.5751	48.3081	9.46882	1.78645	7.84222	1.09087	6.15871	1.17112	3.07222	0.450565	2.89397	0.426189		129.717	123.45	91.7891	67.9439	40.9906	20.5339	25.6282	18.8081	16.1646	13.7617	12.3382	12.6563	11.6692	11.1861
47.8921	119.021	12.5592	48.9014	9.73842	1.83333	7.96787	1.11963	6.2716	1.1811	3.11343	0.459637	3.00405	0.441614		130.496	124.369	91.6727	68.7784	42.1577	21.0728	26.0388	19.3041	16.4609	13.8789	12.5037	12.9112	12.1131	11.5909
45.3743	112.842	11.8555	45.9021	9.1696	1.76862	7.7421	1.08468	6.2242	1.1649	3.1238	0.457232	2.96431	0.437269		123.636	117.912	86.5363	64.5599	39.6953	20.3289	25.301	18.7014	16.3365	13.6886	12.5454	12.8436	11.9529	11.4769
46.0621	114.15	12.1677	47.2097	9.21493	1.74444	7.48811	1.02315	5.69163	1.07795	2.81418	0.411856	2.66553	0.393032		125.51	119.279	88.8155	66.399	39.8915	20.051	24.4709	17.6405	14.9387	12.6669	11.3019	11.569	10.7481	10.3158
43.1204	103.528	11.2049	43.6815	8.62174	1.69422	7.37442	1.03617	5.92647	1.14713	3.0877	0.446189	2.91327	0.438324		117.494	108.18	81.7872	61.4368	37.3236	19.4738	24.0994	17.865	15.555	13.4798	12.4004	12.5334	11.747	11.5046
46.213	109.347	11.9775	46.7033	9.02387	1.6545	7.43115	1.02033	5.71195	1.09239	2.89987	0.428288	2.79861	0.411651		125.921	114.261	87.4271	65.6868	39.0644	19.0173	24.2848	17.5919	14.992	12.8365	11.646	12.0306	11.2847	10.8045
41.834	97.5374	10.7993	42.3914	8.33685	1.58575	7.11381	0.999315	5.74826	1.12747	3.03642	0.451646	2.98705	0.457748		113.989	101.92	78.8272	59.6223	36.0903	18.227	23.2477	17.2296	15.0873	13.2487	12.1945	12.6867	12.0445	12.0144
43.1958	97.6868	10.7316	41.2557	8.00146	1.50444	6.92284	0.965901	5.66127	1.12628	3.06851	0.461583	3.0083	0.457766		117.7	102.076	78.333	58.0248	34.6384	17.2925	22.6237	16.6535	14.859	13.2348	12.3233	12.9658	12.1303	12.0149
40.0913	89.607	9.97592	38.5499	7.55939	1.46522	6.56408	0.949267	5.69975	1.13733	3.10314	0.467189	3.10805	0.474986		109.241	93.6332	72.8169	54.2192	32.7246	16.8416	21.4512	16.3667	14.96	13.3647	12.4624	13.1233	12.5324	12.4668
43.8118	96.951	10.734	41.1279	7.92454	1.45812	6.7195	0.942737	5.49612	1.10586	3.0391	0.455537	3.00104	0.453418		119.378	101.307	78.3502	57.8452	34.3054	16.76	21.9592	16.2541	14.4255	12.9948	12.2052	12.796	12.101	11.9007
42.0359	94.0505	10.5028	40.4575	7.89912	1.47995	7.07703	1.02366	6.12127	1.22238	3.31419	0.489944	3.19746	0.479572		114.539	98.2764	76.6626	56.9023	34.1953	17.0109	23.1276	17.6494	16.0663	14.364	13.31	13.7625	12.893	12.5872
40.4235	90.2585	10.0932	38.8686	7.55551	1.46612	6.59992	0.934788	5.5677	1.1184	3.08906	0.470219	3.15081	0.478116		110.146	94.314	73.6733	54.6674	32.7078	16.852	21.5684	16.117	14.6134	13.1421	12.4059	13.2084	12.7049	12.549
44.3145	97.0435	10.8524	41.6045	7.97579	1.49062	6.82647	0.979386	5.87033	1.17448	3.22928	0.476285	3.16565	0.480869		120.748	101.404	79.2147	58.5155	34.5272	17.1336	22.3087	16.886	15.4077	13.8012	12.969	13.3788	12.7647	12.6212
40.1849	87.2784	9.71954	37.2006	7.32947	1.43097	6.48221	0.943495	5.77539	1.15867	3.18813	0.4746	3.16862	0.480366		109.496	91.2	70.9455	52.3216	31.7293	16.448	21.1837	16.2672	15.1585	13.6153	12.8037	13.3315	12.7767	12.608
42.825	93.7722	10.6286	40.7315	7.80199	1.44122	6.72119	0.967242	5.81782	1.16444	3.20829	0.473835	3.05186	0.46535		116.689	97.9856	77.5808	57.2876	33.7748	16.5657	21.9647	16.6766	15.2699	13.6832	12.8847	13.31	12.3059	12.2139
39.0041	85.0342	9.57932	35.7802	7.31172	1.4373	6.29845	0.914209	5.47475	1.10241	3.04446	0.455027	2.99745	0.452126		106.278	88.8549	69.9221	50.3238	31.6524	16.5206	20.5832	15.7622	14.3694	12.9542	12.2268	12.7817	12.0865	11.8668
42.8301	94.6526	10.7008	40.799	7.82091	1.42655	6.67063	0.926735	5.53196	1.10912	3.06149	0.461333	3.06763	0.467261		116.703	98.9056	78.1079	57.3826	33.8568	16.3972	21.7995	15.9782	14.5196	13.0331	12.2951	12.9588	12.3695	12.2641
43.3944	98.3915	10.711	41.0835	7.91773	1.51936	6.69516	0.930236	5.41938	1.05911	2.88359	0.426385	2.8118	0.432984		118.241	102.812	78.1825	57.7827	34.2759	17.4639	21.8796	16.0386	14.2241	12.4455	11.5807	11.9771	11.3379	11.3644
45.5032	98.5343	10.9875	42.3119	8.07867	1.44986	6.87044	0.968292	5.76527	1.14922	3.18552	0.479593	3.18425	0.492139		123.987	102.962	80.2004	59.5104	34.9726	16.665	22.4524	16.6947	15.1319	13.5044	12.7933	13.4717	12.8397	12.917
40.1108	86.7842	9.71838	37.295	7.24756	1.36966	6.23896	0.885374	5.34274	1.07454	2.96727	0.447727	2.95749	0.452586		109.294	90.6836	70.9371	52.4543	31.3747	15.7433	20.3887	15.2651	14.0229	12.6268	11.9168	12.5766	11.9254	11.8789
39.2401	84.1871	9.46835	36.4129	6.8846	1.33693	5.9645	0.844133	5.15543	1.05879	2.94294	0.446709	2.94142	0.444738		106.921	87.9698	69.1121	51.2136	29.8035	15.367	19.4918	14.554	13.5313	12.4418	11.819	12.548	11.8606	11.6729
36.8707	79.1193	8.88137	31.3472	6.70923	1.31059	5.9098	0.832991	5.10764	1.03901	2.87239	0.437183	2.89636	0.439861		100.465	82.6743	64.8275	44.0888	29.0443	15.0643	19.3131	14.3619	13.4059	12.2093	11.5357	12.2804	11.6789	11.5449
37.4562	80.2818	8.91145	31.8598	6.71104	1.2998	5.76747	0.844351	5.1379	1.02855	2.86989	0.438737	2.86217	0.437696		102.061	83.889	65.0471	44.8098	29.0521	14.9402	18.8479	14.5578	13.4853	12.0864	11.5257	12.3241	11.541	11.4881
38.2327	83.3863	9.25279	32.726	6.82983	1.33326	5.97337	0.861241	5.29582	1.06207	2.97786	0.45567	2.99978	0.448359		104.176	87.1331	67.5386	46.0282	29.5664	15.3248	19.5208	14.849	13.8998	12.4802	11.9593	12.7997	12.0959	11.7679
40.1319	89.1792	9.75753	37.6292	7.38244	1.40563	6.28265	0.903326	5.45322	1.08465	2.9795	0.454676	3.00621	0.455386		109.351	93.1862	71.2229	52.9243	31.9586	16.1567	20.5315	15.5746	14.3129	12.7456	11.9659	12.7718	12.1218	11.9524
38.9211	87.2187	9.52278	36.6672	7.16031	1.38171	6.2644	0.911022	5.57003	1.12071	3.06019	0.457253	2.98392	0.456098		106.052	91.1376	69.5093	51.5713	30.997	15.8817	20.4719	15.7073	14.6195	13.1693	12.2899	12.8442	12.0319	11.9711
42.0611	94.236	10.3624	39.7755	7.64099	1.41415	6.54863	0.93213	5.53423	1.10685	3.0214	0.460012	3.06871	0.468364		114.608	98.4702	75.6377	55.9431	33.0779	16.2546	21.4007	16.0712	14.5255	13.0064	12.1341	12.9217	12.3738	12.293
42.1236	95.7642	10.2931	39.4344	7.63054	1.44518	6.6147	0.948274	5.68824	1.13389	3.13371	0.470705	3.10571	0.463978		114.778	100.067	75.1324	55.4633	33.0327	16.6112	21.6167	16.3495	14.9298	13.3242	12.5852	13.2221	12.523	12.1779
42.4492	97.6223	10.5335	40.4328	7.9265	1.47118	6.70285	0.949164	5.63934	1.11121	3.0563	0.463556	3.0403	0.457182		115.665	102.009	76.8868	56.8675	34.3138	16.9101	21.9047	16.3649	14.8014	13.0577	12.2743	13.0212	12.2593	11.9995
41.3948	96.4334	10.243	39.5404	7.78714	1.46331	6.66568	0.941554	5.5918	1.10132	2.9877	0.449664	2.94878	0.443055		112.792	100.766	74.7664	55.6123	33.7106	16.8196	21.7833	16.2337	14.6766	12.9415	11.9988	12.631	11.8903	11.6287
42.8364	99.9471	10.6915	40.4953	7.93764	1.51443	6.73529	0.939479	5.52498	1.08483	2.94442	0.439352	2.91916	0.439722		116.721	104.438	78.0403	56.9554	34.3621	17.4072	22.0108	16.1979	14.5013	12.7477	11.825	12.3413	11.7708	11.5412
45.6266	105.672	11.3374	43.5222	8.35982	1.49617	6.94667	0.96563	5.56467	1.08601	2.96342	0.443044	2.89905	0.441643		124.323	110.42	82.7547	61.2126	36.1897	17.1973	22.7015	16.6488	14.6054	12.7615	11.9013	12.445	11.6897	11.5917
37.4658	84.2487	9.17559	32.684	7.05472	1.40811	6.1031	0.878193	5.33316	1.06265	2.92169	0.43628	2.9001	0.429688		102.087	88.0342	66.9751	45.969	30.5399	16.1851	19.9448	15.1413	13.9978	12.4871	11.7337	12.2551	11.694	11.2779
36.5649	81.4115	9.00703	31.6273	6.56356	1.27017	5.50032	0.77453	4.66318	0.92586	2.57317	0.390652	2.60729	0.400656		99.6318	85.0695	65.7447	44.4829	28.4137	14.5996	17.9749	13.354	12.2393	10.8797	10.334	10.9734	10.5133	10.5159
35.6428	78.7922	8.66838	30.6637	6.62271	1.30527	5.73422	0.834878	5.08772	1.03997	2.86962	0.437638	2.86559	0.437794		97.1193	82.3325	63.2728	43.1276	28.6697	15.0031	18.7393	14.3945	13.3536	12.2206	11.5246	12.2932	11.5548	11.4907
39.5295	87.9164	9.67862	37.0529	7.2591	1.3841	6.23931	0.890579	5.29935	1.05734	2.92825	0.447159	2.96374	0.437266		107.71	91.8666	70.6469	52.1138	31.4247	15.9092	20.3899	15.3548	13.9091	12.4247	11.76	12.5607	11.9505	11.4768
39.5189	88.5415	9.60585	36.6464	7.24955	1.40904	6.25821	0.920174	5.63457	1.13998	3.18225	0.487197	3.17133	0.48048		107.681	92.5198	70.1157	51.5421	31.3833	16.1958	20.4517	15.8651	14.7889	13.3957	12.7801	13.6853	12.7876	12.611
38.6049	86.9761	9.56585	33.7103	7.3011	1.41208	6.22106	0.874805	5.17984	1.01874	2.78351	0.418185	2.78554	0.417162		105.19	90.8841	69.8237	47.4126	31.6065	16.2308	20.3303	15.0828	13.5954	11.9711	11.1788	11.7468	11.232	10.9491
42.3392	95.7542	10.4376	40.5637	8.05235	1.46483	6.85789	1.00117	5.97753	1.18305	3.20043	0.484538	3.15371	0.476661		115.366	100.057	76.1867	57.0517	34.8586	16.8371	22.4114	17.2615	15.689	13.9019	12.8531	13.6106	12.7166	12.5108
37.3636	84.6188	9.24626	35.4179	7.181	1.38325	6.25991	0.912758	5.54875	1.10633	3.04389	0.462992	3.07128	0.464623		101.808	88.4209	67.491	49.8142	31.0866	15.8994	20.4572	15.7372	14.5636	13.0004	12.2244	13.0054	12.3842	12.1948
38.2475	86.5633	9.55141	33.3258	7.43023	1.35656	6.58721	0.963936	5.966	1.19798	3.35169	0.51699	3.50214	0.528299		104.217	90.4528	69.7183	46.8718	32.1655	15.5926	21.5268	16.6196	15.6588	14.0773	13.4606	14.5222	14.1215	13.8661
40.2061	89.1261	9.95074	36.8888	7.84019	1.32555	6.92584	1.03063	6.39059	1.27537	3.5841	0.556713	3.76677	0.559267		109.553	93.1308	72.6331	51.883	33.9402	15.2363	22.6335	17.7694	16.7732	14.9867	14.394	15.638	15.1886	14.6789
38.8799	88.8966	9.74904	36.0595	7.6721	1.38453	6.66877	1.00202	6.16981	1.23684	3.43231	0.528932	3.61813	0.537018		105.94	92.891	71.1608	50.7167	33.2125	15.9142	21.7934	17.2762	16.1937	14.534	13.7844	14.8576	14.5893	14.095
40.9485	94.5277	10.2245	40.0433	8.0563	1.54164	6.85771	1.00949	6.05576	1.22373	3.36993	0.515223	3.41045	0.514901		111.576	98.775	74.6317	56.3198	34.8758	17.72	22.4108	17.405	15.8944	14.3799	13.5339	14.4726	13.7518	13.5145
40.8511	94.5731	10.2496	39.4833	7.96225	1.5312	6.86735	0.981985	5.91731	1.18022	3.24892	0.496275	3.25823	0.489923		111.311	98.8225	74.8143	55.532	34.4686	17.6	22.4423	16.9308	15.531	13.8686	13.0479	13.9403	13.138	12.8589
39.3611	88.4394	9.70358	37.366	7.42498	1.43394	6.25163	0.900782	5.36664	1.0667	2.91674	0.436146	2.91368	0.442442		107.251	92.4132	70.829	52.5541	32.1428	16.4821	20.4302	15.5307	14.0857	12.5347	11.7138	12.2513	11.7487	11.6127
36.3851	81.2696	8.93768	31.5568	6.95623	1.44402	6.14205	0.890049	5.35488	1.07664	2.96481	0.444766	2.90622	0.435957		99.142	84.9212	65.2385	44.3837	30.1136	16.5979	20.0721	15.3457	14.0548	12.6515	11.9069	12.4934	11.7186	11.4424
